# Supplementary material for: RUNX1 mutations promote leukemogenesis of myeloid malignancies in ASXL1-mutated leukemia
Source: Springer Nature journal article supplement (doi:10.1186/s13045-019-0789-3), 2019-10-22
Supplement: MOESM2 [file 17299432]

**Dataset S1:**

Gene expression microarray analysis of RUNX1-WT, RUNX1-R135T mutant and EV control stably expressed in K562 cell line

**List of Upregulated Genes >2 fold in RUNX1-R135T cells compared to EV**

| Gene Symbol  | Gene Description                                                                 | RUNX1-WT RUNX1-R135T |       |
|--------------|----------------------------------------------------------------------------------|----------------------|-------|
|              |                                                                                  | vs EV                | vs EV |
| HIPK2        | homeodomain interacting protein kinase 2                                         | 0.37                 | 13.12 |
| SCG3         | secretogranin III                                                                | 0.78                 | 10.42 |
| LYVE1        | lymphatic vessel endothelial hyaluronan receptor 1                               | 0.72                 | 8.02  |
| ASXL1        | additional sex combs like transcriptional regulator 1                            | 1.05                 | 6.90  |
| ID1          | inhibitor of DNA binding 1                                                       | 0.58                 | 4.30  |
| MAGEC2       | MAGE family member C2                                                            | 1.02                 | 4.14  |
| IRS1         | insulin receptor substrate 1                                                     | 1.11                 | 3.86  |
| PDE9A        | phosphodiesterase 9A                                                             | 0.66                 | 3.36  |
| PLXDC2       | plexin domain containing 2                                                       | 0.64                 | 3.21  |
| SCRN1        | secernin 1                                                                       | 1.01                 | 3.58  |
| ZBTB38       | zinc finger and BTB domain containing 38                                         | 0.94                 | 3.38  |
| TRIM71       | tripartite motif containing 71, E3 ubiquitin protein ligase                      | 1.00                 | 3.43  |
| SH3BGR13     | SH3 domain binding glutamate-rich protein like 3                                 | 0.75                 | 3.06  |
| ASIC4        | acid sensing ion channel family member 4                                         | 0.87                 | 3.23  |
| SLC19A1      | solute carrier family 19 (folate transporter), member 1                          | 1.13                 | 3.14  |
| MTND1P5      | mitochondrially encoded NADH:ubiquinone oxidoreductase core subunit 1 pseudogene | 1.16                 | 3.09  |
| MIR4503      | microRNA 4503                                                                    | 1.00                 | 3.17  |
| AEBP1        | AE binding protein 1                                                             | 0.89                 | 3.03  |
| TLCD1        | TLC domain containing 1                                                          | 0.69                 | 2.67  |
| FRMD4A       | FERM domain containing 4A                                                        | 1.20                 | 2.91  |
| PLN          | phospholamban                                                                    | 0.90                 | 2.98  |
| PLEK         | pleckstrin                                                                       | 0.99                 | 3.01  |
| U1           | U1 spliceosomal RNA                                                              | 0.97                 | 2.95  |
| F2RL2        | coagulation factor II (thrombin) receptor-like 2                                 | 0.80                 | 2.65  |
| RNU6-904P    | RNA, U6 small nuclear 904, pseudogene                                            | 1.02                 | 2.85  |
| TMEM214      | transmembrane protein 214                                                        | 1.20                 | 2.67  |
| CD3EAP       | CD3e molecule, epsilon associated protein                                        | 1.15                 | 2.70  |
| LOC100287392 | Transcript Identified by AceView, Entrez Gene ID(s) 100287392                    | 0.58                 | 2.11  |
| BCL9L        | B-cell CLL/lymphoma 9-like                                                       | 1.13                 | 2.70  |
| GRWD1        | glutamate-rich WD repeat containing 1                                            | 0.83                 | 2.62  |
| FBXL14       | F-box and leucine-rich repeat protein 14                                         | 0.94                 | 2.75  |
| FAM189B      | family with sequence similarity 189, member B                                    | 0.87                 | 2.67  |
| RNU6-470P    | RNA, U6 small nuclear 470, pseudogene                                            | 1.13                 | 2.67  |
| TOB2         | transducer of ERBB2, 2                                                           | 1.10                 | 2.67  |
| VAC14        | Vac14 homolog ( <i>S. cerevisiae</i> )                                           | 1.14                 | 2.62  |
| RPS23P5      | ribosomal protein S23 pseudogene 5 [Source:HGNC Symbol;Acc:HGNC:35171]           | 1.00                 | 2.74  |
| DHX34        | DEAH (Asp-Glu-Ala-His) box polypeptide 34                                        | 1.13                 | 2.61  |
| MKL1         | megakaryoblastic leukemia (translocation) 1                                      | 1.02                 | 2.71  |
| MIR1252      | microRNA 1252                                                                    | 1.08                 | 2.59  |
| SPATA2       | spermatogenesis associated 2                                                     | 1.16                 | 2.51  |

|            |                                                                         |      |      |
|------------|-------------------------------------------------------------------------|------|------|
| GNG12      | guanine nucleotide binding protein (G protein), gamma 12                | 0.96 | 2.61 |
| EHD1       | EH domain containing 1                                                  | 1.02 | 2.61 |
| RITA1      | RBPJ interacting and tubulin associated 1                               | 1.19 | 2.43 |
| H2AFX      | H2A histone family, member X                                            | 0.90 | 2.50 |
| ZFP36L2    | ZFP36 ring finger protein-like 2                                        | 1.09 | 2.52 |
| CAMK2B     | Transcript Identified by AceView, Entrez Gene ID(s) 816                 | 1.19 | 2.41 |
| FABP5P1    | fatty acid binding protein 5 pseudogene 1                               | 1.19 | 2.41 |
| CNOT3      | CCR4-NOT transcription complex subunit 3                                | 1.09 | 2.50 |
| TTL7       | tubulin tyrosine ligase-like family member 7                            | 0.82 | 2.34 |
| WAS        | Wiskott-Aldrich syndrome                                                | 0.98 | 2.54 |
| MIR1261    | microRNA 1261                                                           | 1.12 | 2.41 |
| SCOC-AS1   | SCOC antisense RNA 1                                                    | 1.14 | 2.39 |
| ZFP36L1    | ZFP36 ring finger protein-like 1                                        | 0.84 | 2.34 |
| CAD        | acyl-phosphate synthetase 2, aspartate transcarbamylase, and dihydro    | 0.75 | 2.19 |
| CD68       | CD68 molecule                                                           | 0.85 | 2.34 |
| FARSA      | phenylalanyl-tRNA synthetase alpha subunit                              | 1.17 | 2.33 |
| SLC25A44   | solute carrier family 25, member 44                                     | 0.74 | 2.15 |
| POM121C    | POM121 transmembrane nucleoporin C                                      | 1.12 | 2.37 |
| NTS        | neurotensin                                                             | 0.81 | 2.26 |
| GMPPB      | GDP-mannose pyrophosphorylase B                                         | 1.06 | 2.42 |
| ZMIZ2      | zinc finger, MIZ-type containing 2                                      | 0.76 | 2.16 |
| MTSS1L     | metastasis suppressor 1-like                                            | 1.20 | 2.28 |
| AKT1S1     | AKT1 substrate 1 (proline rich)                                         | 1.19 | 2.28 |
| LGALS1     | lectin, galactoside-binding, soluble, 1                                 | 1.15 | 2.31 |
| RNU6-1333P | RNA, U6 small nuclear 1333, pseudogene                                  | 1.00 | 2.45 |
| ATP13A1    | ATPase type 13A1                                                        | 0.90 | 2.34 |
| Evf1_2     | Embryonic ventral forebrain RNA 1 conserved region 2                    | 1.00 | 2.44 |
| SELT       | selenoprotein T                                                         | 1.05 | 2.38 |
| LY6E       | lymphocyte antigen 6 complex, locus E                                   | 0.81 | 2.18 |
| DHCR24     | 24-dehydrocholesterol reductase                                         | 1.13 | 2.28 |
| TAAR7P     | trace amine associated receptor 7, pseudogene                           | 0.82 | 2.19 |
| FOXJ2      | forkhead box J2                                                         | 1.04 | 2.37 |
| RNY4P13    | RNA, Ro-associated Y4 pseudogene 13                                     | 1.01 | 2.39 |
| ART2P      | Adenine ribosyltransferase 2, pseudogene [Source:HGNC Symbol;Acc:HGNC:7 | 0.97 | 2.35 |
| TRIAP1     | TP53 regulated inhibitor of apoptosis 1                                 | 1.19 | 2.19 |
| TMUB1      | transmembrane and ubiquitin-like domain containing 1                    | 1.09 | 2.30 |
| FUBP3      | Transcript Identified by AceView, Entrez Gene ID(s) 8939                | 1.17 | 2.21 |
| NDOR1      | NADPH dependent diflavin oxidoreductase 1                               | 0.90 | 2.27 |
| STEAP3     | STEAP family member 3, metalloredutase                                  | 0.75 | 2.02 |
| TACC1      | transforming, acidic coiled-coil containing protein 1                   | 0.89 | 2.23 |
| FBRS       | fibrosin                                                                | 0.77 | 2.04 |
| MFSD12     | major facilitator superfamily domain containing 12                      | 1.17 | 2.17 |
| EPN2       | epsin 2                                                                 | 1.19 | 2.14 |
| TEX261     | testis expressed 261                                                    | 1.18 | 2.14 |
| CDK2AP2    | cyclin-dependent kinase 2 associated protein 2                          | 0.89 | 2.18 |
| SEPN1      | selenoprotein N, 1                                                      | 0.97 | 2.26 |

|           |                                                                       |      |      |
|-----------|-----------------------------------------------------------------------|------|------|
| SLC9A1    | carrier family 9, subfamily A (NHE1, cation proton antiporter 1), mem | 1.00 | 2.29 |
| TRAPPC4   | trafficking protein particle complex 4                                | 1.19 | 2.09 |
| TMEM184B  | transmembrane protein 184B                                            | 1.15 | 2.13 |
| KCNK5     | potassium channel, two pore domain subfamily K, member 5              | 0.97 | 2.25 |
| MAB21L2   | mab-21-like 2 (C. elegans)                                            | 1.14 | 2.13 |
| TIMM8A    | translocase of inner mitochondrial membrane 8 homolog A (yeast)       | 1.00 | 2.27 |
| TMEM109   | transmembrane protein 109                                             | 1.12 | 2.14 |
| ARHGDI A  | Rho GDP dissociation inhibitor (GDI) alpha                            | 1.07 | 2.18 |
| EIF1AD    | eukaryotic translation initiation factor 1A domain containing         | 1.16 | 2.09 |
| CD53      | CD53 molecule                                                         | 1.01 | 2.24 |
| SCARNA3   | small Cajal body-specific RNA 3                                       | 1.15 | 2.10 |
| ARHGAP22  | Rho GTPase activating protein 22                                      | 1.13 | 2.12 |
| SLC2A13P1 | SLC2A13 pseudogene 1                                                  | 1.00 | 2.24 |
| RBM33     | RNA binding motif protein 33                                          | 0.92 | 2.15 |
| ISG20L2   | interferon stimulated exonuclease gene 20kDa like 2                   | 0.84 | 2.05 |
| RAB35     | RAB35, member RAS oncogene family                                     | 1.06 | 2.18 |
| GYLTL1B   | glycosyltransferase-like 1B                                           | 1.04 | 2.19 |
| FYB       | FYN binding protein                                                   | 1.00 | 2.23 |
| PRDX2P2   | peroxiredoxin 2 pseudogene 2                                          | 0.95 | 2.17 |
| PHLDA1    | pleckstrin homology-like domain, family A, member 1                   | 1.18 | 2.04 |
| PTMS      | parathymosin                                                          | 1.02 | 2.19 |
| MYRF      | myelin regulatory factor                                              | 1.02 | 2.18 |
| NRSN2     | neurensin 2                                                           | 1.09 | 2.11 |
| PKN3      | protein kinase N3                                                     | 1.12 | 2.08 |
| SURF2     | surfeit 2 [Source:HGNC Symbol;Acc:HGNC:11475]                         | 1.00 | 2.20 |
| BICD2     | bicaudal D homolog 2 (Drosophila)                                     | 0.97 | 2.17 |
| PTRHD1    | peptidyl-tRNA hydrolase domain containing 1                           | 1.05 | 2.13 |
| RBM26     | iczak2013 ANTISENSE, CDS, coding, INTERNAL best transcript NM_022     | 0.87 | 2.04 |
| MIR1284   | microRNA 1284                                                         | 1.00 | 2.18 |
| ATN1      | atrophin 1                                                            | 1.01 | 2.16 |
| TRMU      | tRNA 5-methylaminomethyl-2-thiouridylate methyltransferase            | 1.13 | 2.04 |
| CREB3L2   | cAMP responsive element binding protein 3-like 2                      | 0.96 | 2.11 |
| COX8A     | cytochrome c oxidase subunit VIIIA (ubiquitous)                       | 1.15 | 2.00 |
| NOL6      | nucleolar protein 6 (RNA-associated)                                  | 1.00 | 2.15 |
| SLC9B1P1  | (NHA1, cation proton antiporter 1), member 1 pseudogene 1 [Source     | 1.08 | 2.07 |
| KDM4A-AS1 | KDM4A antisense RNA 1                                                 | 1.08 | 2.06 |
| C17orf89  | chromosome 17 open reading frame 89                                   | 1.13 | 2.01 |
| NR1D1     | nuclear receptor subfamily 1, group D, member 1                       | 0.96 | 2.09 |
| BOP1      | block of proliferation 1                                              | 1.05 | 2.09 |
| MATK      | megakaryocyte-associated tyrosine kinase                              | 0.90 | 2.02 |
| EEF1A2    | eukaryotic translation elongation factor 1 alpha 2                    | 0.96 | 2.09 |
| POLR2A    | polymerase (RNA) II (DNA directed) polypeptide A, 220kDa              | 0.94 | 2.07 |
| FJX1      | four jointed box 1                                                    | 1.08 | 2.04 |
| TIMM8B    | translocase of inner mitochondrial membrane 8 homolog B (yeast)       | 0.98 | 2.10 |
| SEC61B    | Sec61 translocon beta subunit                                         | 0.99 | 2.10 |
| TMEM138   | transmembrane protein 138                                             | 0.98 | 2.09 |

|          |                                                                   |       |      |
|----------|-------------------------------------------------------------------|-------|------|
| ND6      | NADH dehydrogenase, subunit 6 (complex I)                         | 0.95  | 2.05 |
| OR9A2    | olfactory receptor, family 9, subfamily A, member 2               | 1.00  | 2.10 |
| DYNLT1   | dynein, light chain, Tctex-type 1                                 | 0.93  | 2.02 |
| SMCR8    | Smith-Magenis syndrome chromosome region, candidate 8             | 1.08  | 2.01 |
| NACC2    | NACC family member 2, BEN and BTB (POZ) domain containing         | 0.97  | 2.06 |
| HEPACAM2 | HEPACAM family member 2                                           | 1.02  | 2.06 |
| ZPLD1    | zona pellucida-like domain containing 1                           | 1.03  | 2.04 |
| ABCB6    | ATP binding cassette subfamily B member 6 (Langereis blood group) | 1.02  | 2.05 |
| FTSJ3    | FtsJ homolog 3 (E. coli)                                          | 1.02  | 2.04 |
| UBE2D3P4 | ubiquitin conjugating enzyme E2D 3 pseudogene 4                   | 1.00  | 2.04 |
| NOL4L    | nucleolar protein 4-like                                          | 1.01  | 2.01 |
| FOXRED2  | FAD-dependent oxidoreductase domain containing 2                  | 1.01  | 2.01 |
| DNAJA1P1 | DnaJ heat shock protein family (Hsp40) member A1 pseudogene 1     | -1.03 | 2.16 |
| FOXM1    | forkhead box M1                                                   | 1.02  | 2.18 |
| ASIC1    | acid sensing ion channel 1                                        | 1.13  | 2.07 |
